# Supplementary material for: A nanozyme-catalysis-based ratiometric electrochemical sensor for general detection of Cd2+
Source: Royal Society of Chemistry journal article supplement (doi:10.1039/d2an01480g), 2022-01-01
Supplement: d2an01480g1.pdf [file d2an01480g1.pdf]

## Supporting information

### **Nanozyme catalysis based ratiometric electrochemical sensor for generally applicable detection of Cd<sup>2+</sup>**

Shan Luo, Xianwen Kan\*

Key Laboratory of Functional Molecular Solids, Ministry of Education, Anhui  
Laboratory of Molecule-Based Materials, Anhui Key Laboratory of Chemo-  
Biosensing, College of Chemistry and Materials Science, Anhui Normal University,  
Wuhu 241000, PR China

\*Corresponding author:

Xianwen Kan

E-mail: kanxw@mail.ahnu.edu.cn;

Tel: +86-553-3937135;

Fax: +86-553-3869303.



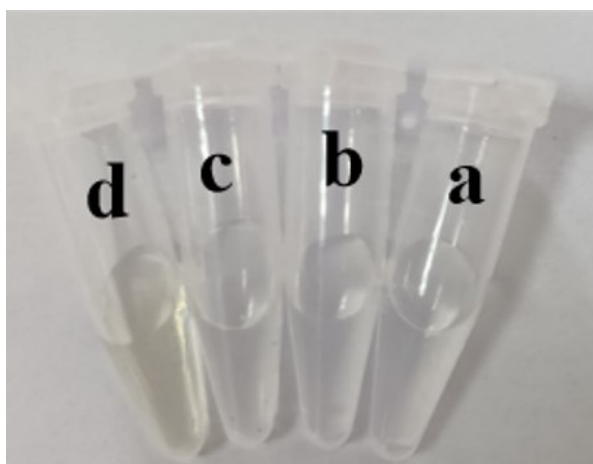

Fig. S1 The optical photograph of OPD (a), OPD + H<sub>2</sub>O<sub>2</sub> (b), OPD + H<sub>2</sub>O<sub>2</sub> + rGO (c), and OPD + H<sub>2</sub>O<sub>2</sub> + AuPt-rGO (d). (0.05 mol·L<sup>-1</sup> N<sub>2</sub>-saturated Tris-HCl buffer solution (pH 7.5), OPD (10 mmol·L<sup>-1</sup>), H<sub>2</sub>O<sub>2</sub> (10 mmol·L<sup>-1</sup>)).

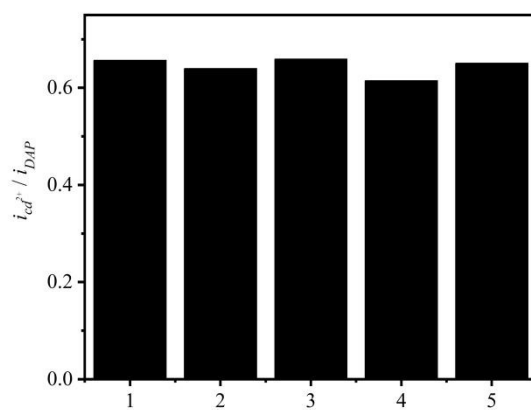

Fig. S2 The reproducibility of AuPt-rGO/GCE.

**Table S1** Comparison the electrochemical abilities between AuPt-rGO/GCE and other sensors for Cd<sup>2+</sup> detection.

| Electrochemical sensors                       | Method | Linear range (μmol/L) | LOD (nmol/L) | References |
|-----------------------------------------------|--------|-----------------------|--------------|------------|
| CS/AuNPs/GR/GCE                               | DPV    | 0.1–0.9               | 0.162        | [1]        |
| Co <sub>3</sub> O <sub>4</sub> /GO/Nafion/GCE | DPASV  | 1.4–6.4               | 57           | [2]        |
| NCQDs-GO/GCE                                  | ASV    | 0.1–100               | 66.3         | [3]        |
| CNT-SO <sub>3</sub> H/RhB-LB/GCE              | SWASV  | 0.1–1.2               | 80           | [4]        |
| g-C <sub>3</sub> N <sub>4</sub> nanosheet/GCE | SWASV  | 0.05–0.7              | 3.97         | [5]        |
| trGNO/Fc-NH <sub>2</sub> -UiO-66/GCE          | DPASV  | 0.01–2                | 8.5          | [6]        |
| polyPCA/GE                                    | SWASV  | 0.36–8.9              | 137          | [7]        |
| NCO/N, S-rGO/GCE                              | DPASV  | 0.3–3.0               | 123          | [8]        |
| BOC/GCE                                       | DPASV  | 0.089–0.44            | 37.7         | [9]        |
| AuPt-rGO/GCE                                  | DPV    | 0.05–100              | 31           | This work  |

## References

- [1] S. Wu, K. Li, X. Dai, Z. Zhang, F. Ding, S. Li, *Microchem. J.*, **2020**, 155, 104710.
- [2] Y. Hao, C. Zhang, W. Wang, J. Wang, S. Chen, H. Xu, S. Zhuiykov, *J. Electrochem. Soc.*, **2021**, 168, 083503.
- [3] L. Li, D. Liu, A. Shi, *Sens. Actuators B-Chem.*, **2018**, 255, 1762-1770.
- [4] K. Chen, J. Li, L. Zhang, R. Xing, T. Jiao, F. Gao and Q. Peng, *Nanotechnology*, **2018**, 29, 445603.
- [5] Y. Liu, G. L. Wen, X. Chen, R. Weerasooriya, Z. Y. Hong, L. C. Wang, Z. J. Huang, Y. C. Wu, *Anal. Bioanal. Chem.*, **2020**, 412, 343-353.
- [6] X. Wang, Y. Qi, Y. Shen, Y. Yuan, L. Zhang, C. Zhang, Y. Sun, *Sens. Actuators B-Chem.*, **2020**, 310, 127765.
- [7] T. M. Lima, P. I. Soares, L. A. Do Nascimento, D. L. Franco, A. C. Pereira, L. F. Ferreira, *Microchem. J.*, **2021**, 168, 106406.
- [8] J. Pang, H. Fu, W. Kong, R. Jiang, J. Ye, Z. Zhao, J. Hou, K. Sun, Y. Zheng, L. Chen, *Chem. Eng. J.*, **2022**, 433, 133854.
- [9] Y. Zhang, C. Li, Y. Su, W. Mu, X. Han, *Inorg. Chem. Commun.*, **2020**, 111, 107672.

**Table S2** Determination of Cd<sup>2+</sup> in different real samples.

| Samples                | Added<br>( $\mu\text{mol/L}$ ) | Found <sup>a</sup><br>( $\mu\text{mol/L}$ ) | Recovery<br>(%) | RSD<br>(%) |
|------------------------|--------------------------------|---------------------------------------------|-----------------|------------|
| Wastewater 1           | 5.0                            | 4.96                                        | 99.41           | 3.26       |
|                        | 10.0                           | 9.56                                        | 95.71           | 1.32       |
| Wastewater 2           | 5.0                            | 4.92                                        | 98.63           | 3.44       |
|                        | 10.0                           | 10.48                                       | 104.87          | 2.09       |
| Yangtze River<br>water | 5.0                            | 4.82                                        | 96.59           | 3.36       |
|                        | 10.0                           | 10.01                                       | 100.19          | 3.27       |
| Huajin Lake water      | 5.0                            | 4.84                                        | 96.89           | 1.60       |
|                        | 10.0                           | 10.49                                       | 104.80          | 2.02       |
| Tap water              | 5.0                            | 4.85                                        | 97.18           | 3.39       |
|                        | 10.0                           | 9.87                                        | 98.76           | 2.93       |
| Mineral water          | 5.0                            | 4.79                                        | 96.01           | 3.21       |
|                        | 10.0                           | 10.21                                       | 102.23          | 3.95       |

<sup>a</sup> Average value of three determinations.
